# Supplementary material for: Synthesis of energetic salts containing three heterocyclic anions by a one-pot condensation reaction
Source: Royal Society of Chemistry journal article supplement (doi:10.1039/c9nj03857d), 2019-01-01
Supplement: c9nj03857d1.pdf [file c9nj03857d1.pdf]

## Supporting Information

### **Synthesis of Energetic Salts Containing Three Heterocyclic Anions by One-Pot Condensation Reaction**

Panpan Peng,<sup>a</sup> Baoping Hu,<sup>a</sup> Feipeng Lu,<sup>a</sup> Yao Du,<sup>a</sup> Chaofeng Zhao,<sup>a</sup> Hui  
Su,<sup>a</sup> Pengcheng Zhang,<sup>a</sup> Shenghua Li,<sup>\*a</sup> and Siping Pang,<sup>\*a</sup>

<sup>a</sup>School of Materials Science & Engineering, Beijing Institute of  
Technology, Beijing 100081, PR China.

\*Correspondence to: lishenghua@bit.edu.cn, pangsp@bit.edu.cn

## 1. Chemical and Materials.

**Synthesis of Ammonium 5-nitrotetrazole.** Firstly, 4.25 g (50 mmol) 5-aminotetrazole, 0.2 g (0.8 mmol)  $\text{Cu}(\text{SO}_4)_2 \cdot 5\text{H}_2\text{O}$  and 2.8 mL  $\text{H}_2\text{SO}_4$  (98%) were added into 35 mL ice water, a blue transparent solution system A obtained after mixed and dissolved fully. Then, 35 g of crushed ice, 5.5 g (22 mmol)  $\text{Cu}(\text{SO}_4)_2 \cdot 5\text{H}_2\text{O}$ , 10.4 g (150 mmol)  $\text{NaNO}_2$  and 25 mL  $\text{H}_2\text{O}$  (distilled water) were added into three flasks in turn, (ice salt bath) control temperature is below 3 °C and fully stirring obtained system B; then slowly adding A to B, control time is about 30 min, the whole process system temperature does not exceed 5 °C, fully stirring (color from dark green to blue and then to light green), after dripping, reaction at room temperature 1 h. Then 4.0 g (100 mmol) NaOH was dissolved in 10-15 mL distilled water, which was added to the three flasks above, and the temperature was raised to 70 °C for 1 h. After the reaction, hot water filtration and wash 2-3 times, then 1.6 mL  $\text{H}_2\text{SO}_4$  (98%) acidification filtrate and 4 g activated carbon was added to filtrate for adsorbing 15 min. The filtrate was extracted and acidified again with 1.6 mL  $\text{H}_2\text{SO}_4$  (98%). For acidified filtrate, the mixture of  $\text{CH}_2\text{Cl}_2$  (130 mL) and laurylamine (20 mL) was used as extractant to extract for 3-5 times; the extracted solution was dried by adding appropriate amount of anhydrous  $\text{MgSO}_4$  for 12 h, and then filtered;  $\text{NH}_3$  was injected into the filtrate, resulting in a white precipitation of 5-nitrotetrazolium ammonium salt. Yield: 80%

(The density is 1.57  $\text{g} \cdot \text{cm}^{-3}$ , the melting point is 202 °C, the impact sensitivity is 30/ 75 (12/ 12B/cm), and the spark sensitivity is 2.66/ 7.58 (3/ 10/ -mil foil))

**Synthesis of Ammonium 3,5-dinitro-1,2,4-triazole.** 4 g (40.4 mmol) 3,5-diamino-1,2,4-triazole was dissolved in 292 mL  $\text{H}_2\text{SO}_4$  (0.68 mol/L), and then clarified transparent solution A was obtained. In a three-port flask, 26.6 g (385.5 mmol)  $\text{NaNO}_2$  was added to 30 mL distilled water, and the system B is obtained by stirring strongly at -7 °C. Then, A is slowly added to B (a large amount of  $\text{NO}_2$  is produced), the reaction temperature is controlled between -10 ~ -5 °C, and the dripping time depends on the severity of the reaction (strictly controlling the reaction temperature and dripping acceleration to prevent the overflow or agglomeration of the solution), generally 2 ~ 3 h; After dropping, the reaction temperature rises to 60 °C for 1 h with the stirring rate 500 rpm, then cooling to 0-5 C, 13.25 mL  $\text{H}_2\text{SO}_4$  (6 mol/L) are added to the reaction solution to acidification and 2 g urea to quenching, then 2 g activated carbon is added to absorb and decolorize for 30 min. Then the filtrate was extracted with mixed solvent of toluene (130 mL) and laurylamine (20 mL) for 3 ~

5 times; the extracted solution was dried with anhydrous  $\text{MgSO}_4$  and stored in refrigerator at low temperature for 12 h, then  $\text{NH}_3$  was injected into the filtrate at  $0 \sim 5 \text{ }^\circ\text{C}$  to obtain the red-brown solid precipitation.  $\text{CH}_2\text{Cl}_2$  (10 mL) washed the red-brown solid 2 ~ 3 times and then got the golden 5-dinitro-1,2,4-triazole ammonium salt solid, which was recrystallized with methanol/ethyl acetate mixed solvent. Yield: 75%

(The density is  $1.632 \text{ g}\cdot\text{cm}^{-3}$ , the decomposition temperature is  $170 \text{ }^\circ\text{C}$ , the impact sensitivity is 59/80 (12/ 12B/ cm), and the critical temperature of thermal explosion is  $222 \text{ }^\circ\text{C}$ )

## 2. Experimental data and spectrum

**Product 1:** ((2E,2'E,2''E)-2,2',2''-(benzene-1,3,5-triyltris(methanylylidene))tris(hydrazin-1-yl-2-ylidene))tris(aminomethaniminium) 5-nitrotetrazolate

**Product 2:** ((2E,2'E,2''E)-2,2',2''-(benzene-1,3,5-triyltris(methanylylidene))tris(hydrazin-1-yl-2-ylidene))tris(aminomethaniminium) 3,5-dinitro-1,2,4-triazole

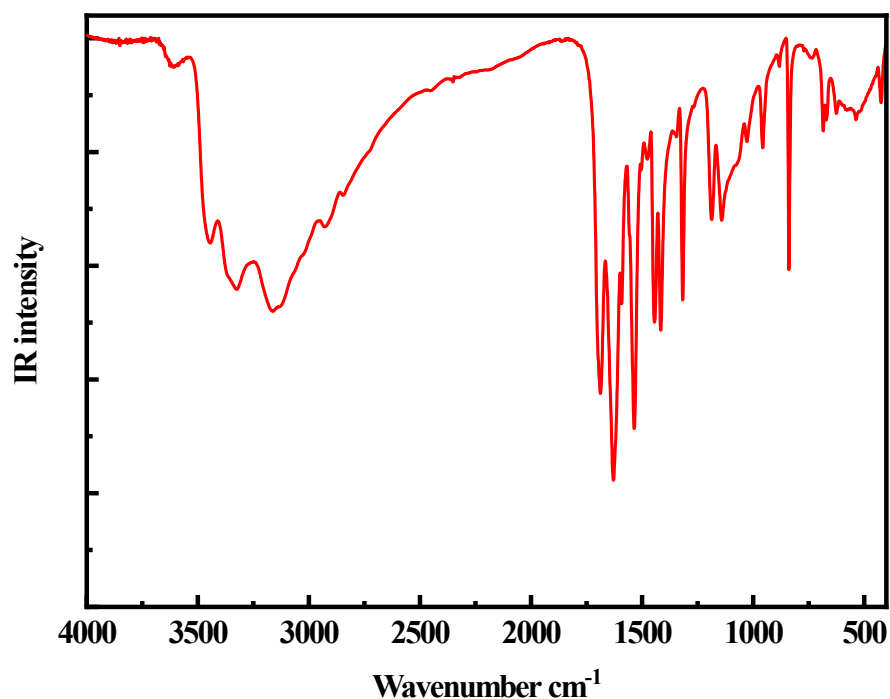

Fig S1. FT-IR spectrum of product 1.

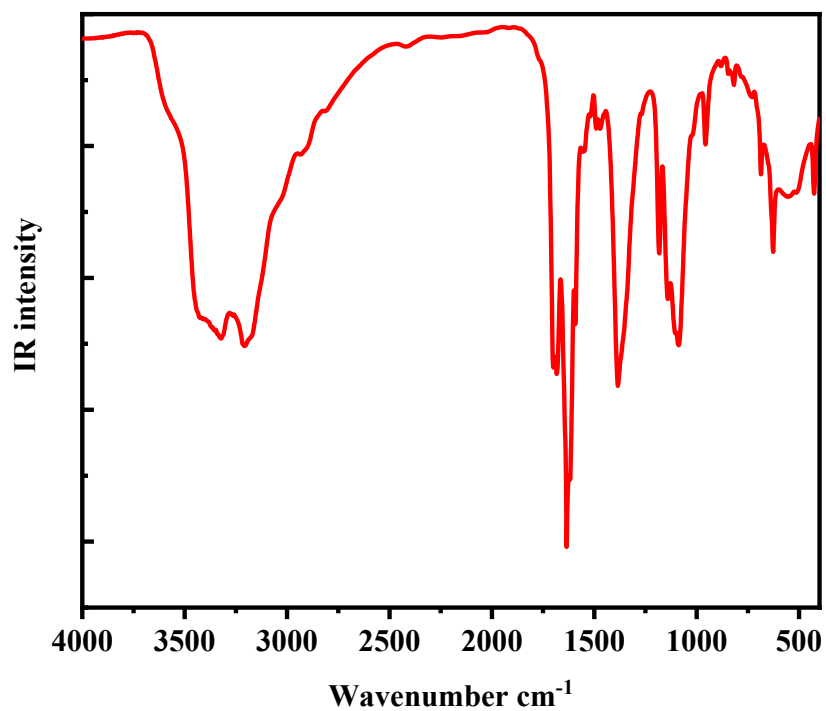

Fig S2. FT-IR spectrum of product 2.

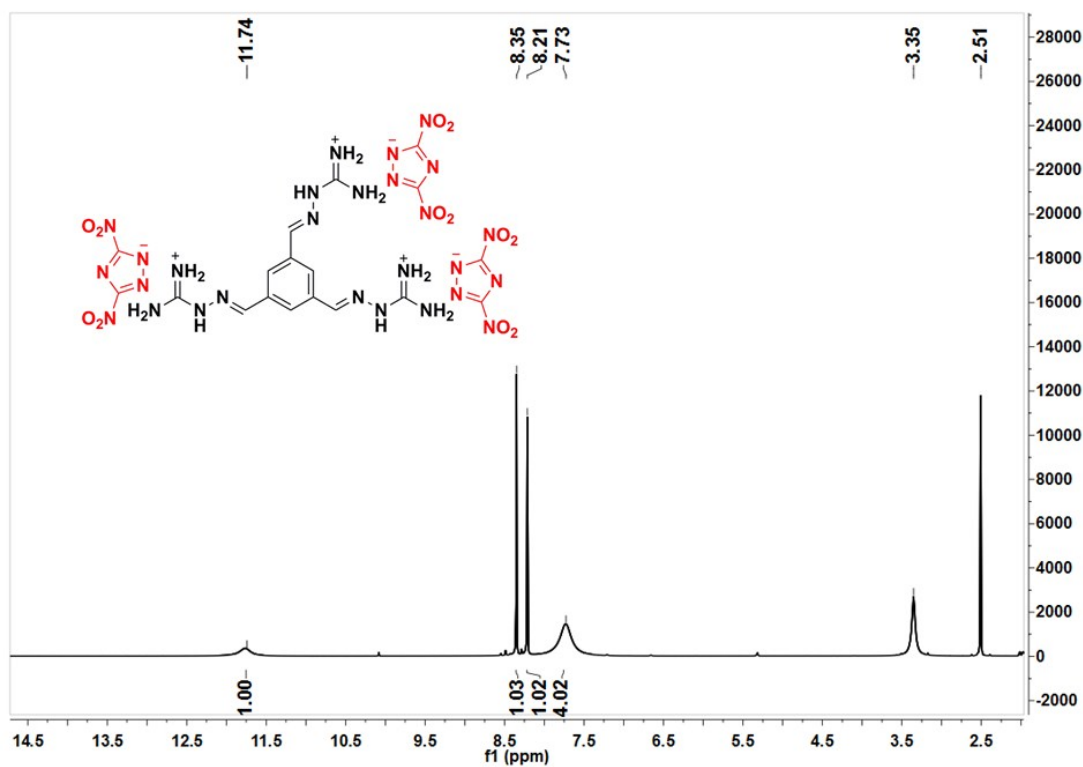

Fig S3.  $^1\text{H}$  NMR spectrum of product 2.

**Product 3:** ((2E,2'E,2''E)-2,2',2''-(benzene-1,3,5-triyltris(methanylylidene))tris(hydrazin-1-yl-2-ylidene))tris(aminomethaniminium) 4-methylbenzenesulfonate

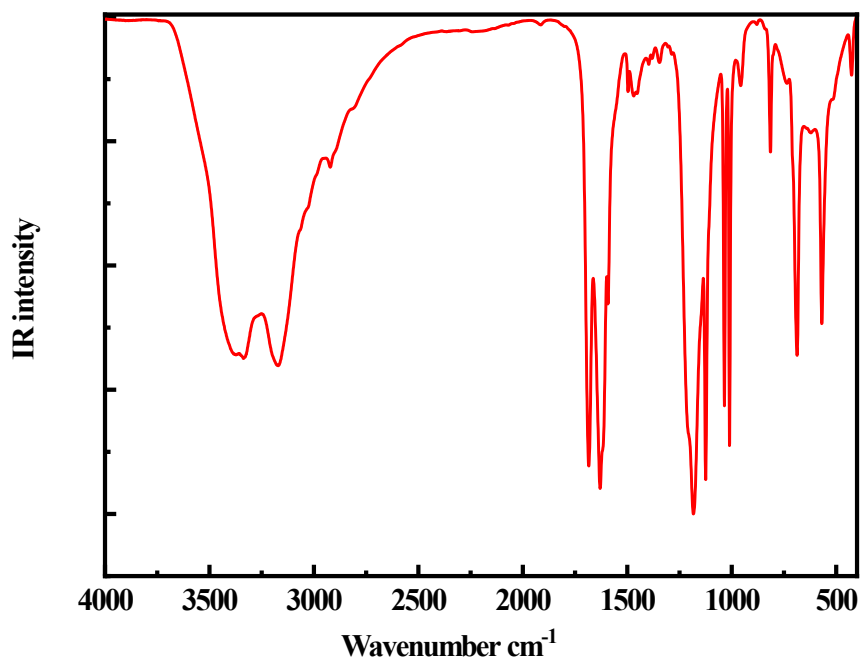

Fig S4. FT-IR spectrum of product 3.

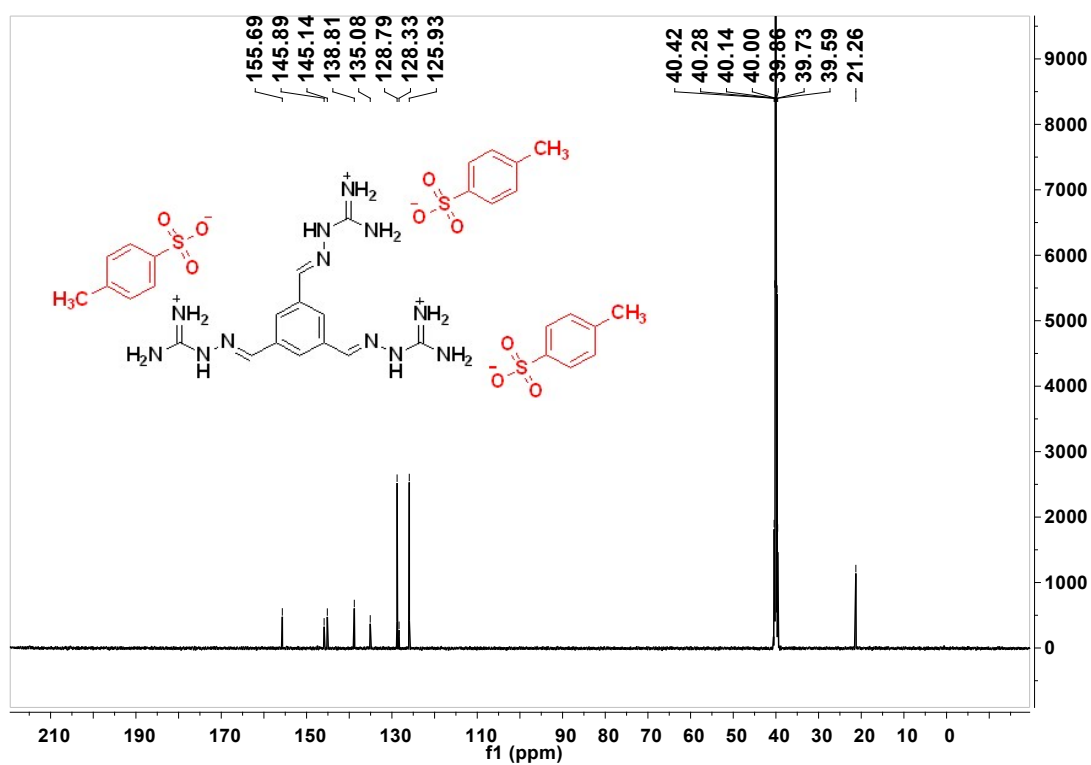

Fig S5.  $^{13}\text{C}$  NMR spectrum of product 3.

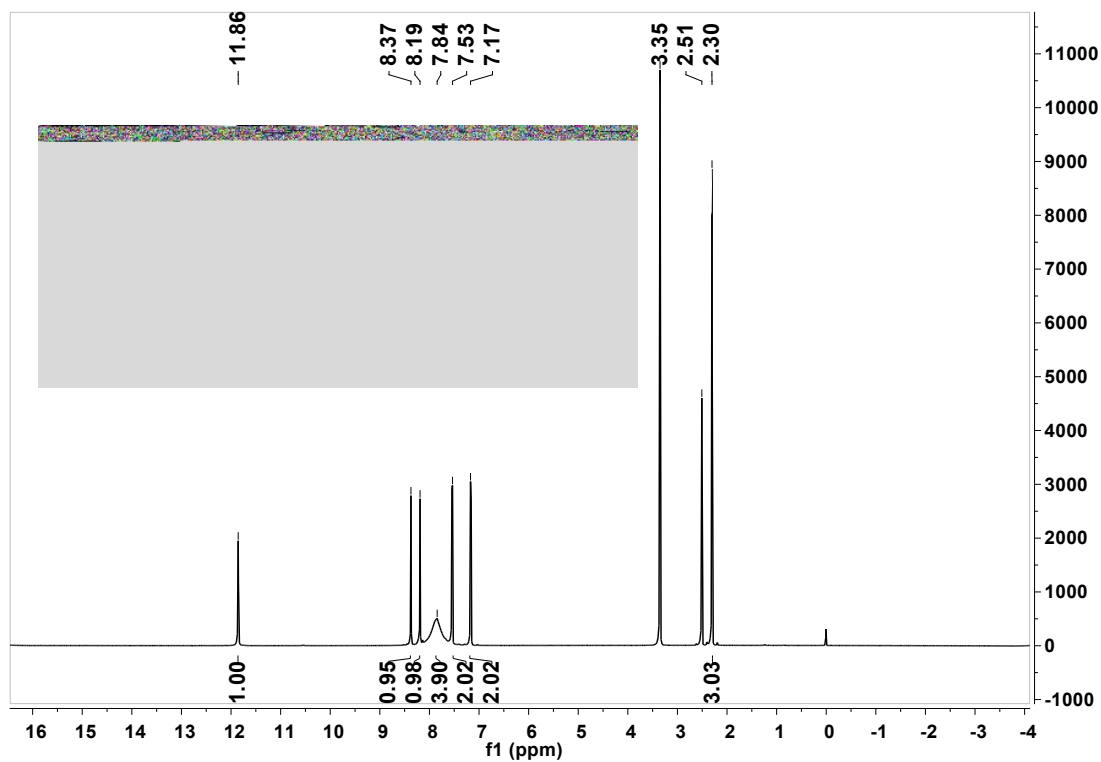

Fig S6.  $^1\text{H}$  NMR spectrum of product 3.

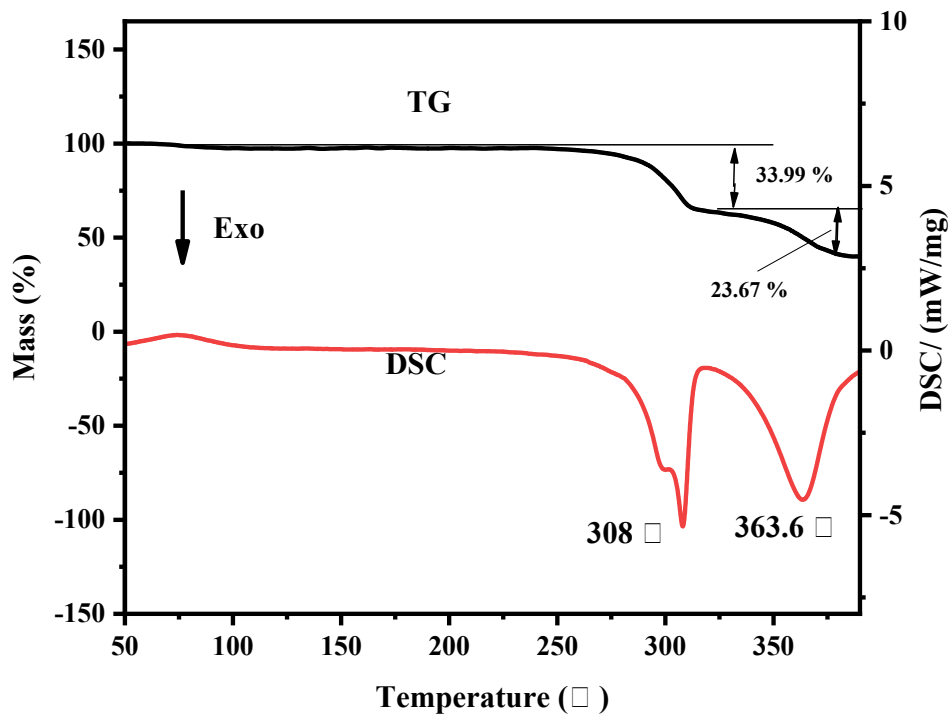

Fig S7. DSC-TG curves of product 2.

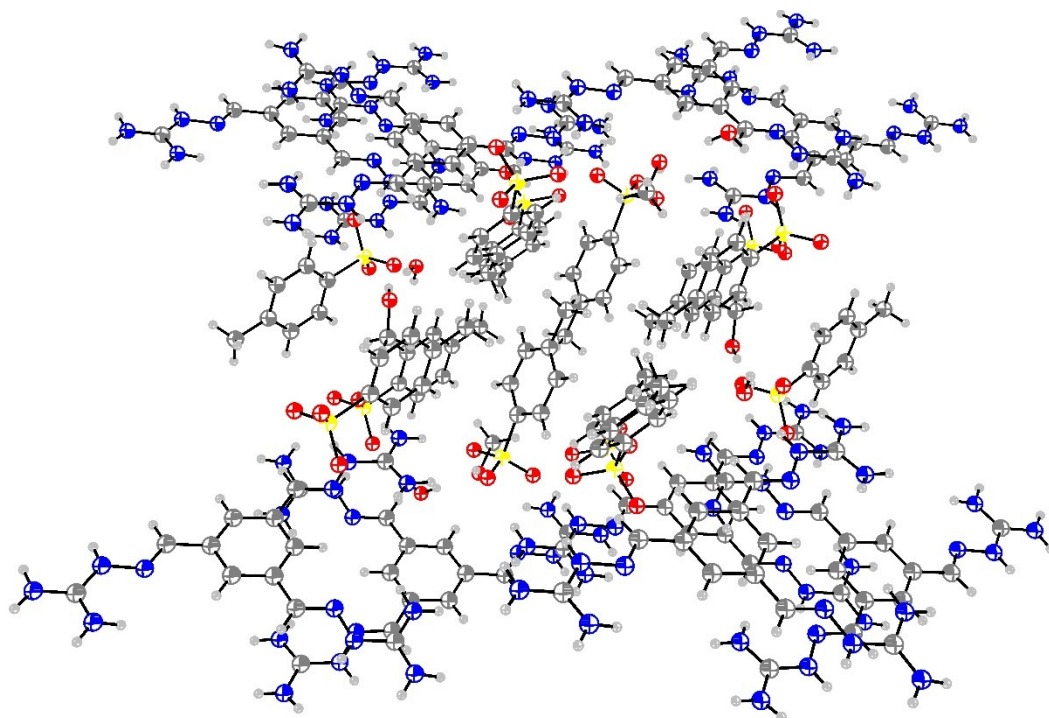

**Fig S8.** Cell stacking diagram of product 3.
